# Supplementary material for: Inactivation of a Foodborne Norovirus Outbreak Strain with Nonthermal Atmospheric Pressure Plasma
Source: PubMed Central journal article supplement — mBio. 2015 Jan 13;6(1):e02300-14. doi: 10.1128/mBio.02300-14 (PMC4311907; doi:10.1128/mbio.02300-14), 2015-01-13
Supplement: mbo001152132st5.pdf [file mbo001152132st5.pdf]

Table S2:

| CAPP exposure              | RNase A digestion | Titer at dilution -2 | Titer at dilution -3 | Titer at dilution -4 |
|----------------------------|-------------------|----------------------|----------------------|----------------------|
| 0 min (initial viral load) | -                 | 4.37±0.14            | 3.34±0.05            | 1.57±0.38            |
| 0 min (positive control)   | +                 | 4.19±0.05            | 2.52±0.12            | 1.03±0.11            |
| 0.5 min                    | +                 | 3.90±0.25            | 2.30±0.30            | 0.85±0.31            |
| 1 min                      | +                 | 3.89±0.01            | 2.26±0.09            | 0.39±0.37            |
| 2 min                      | +                 | 3.68±0.06            | 2.03±0.29            | 0.58±0.84            |
| 3 min                      | +                 | 3.68±0.18            | 1.92±0.37            | 0.13±0.06            |
| 4 min                      | +                 | 3.60±0.13            | 2.02±0.17            | 0.78±0.29            |
| 5 min                      | +                 | 3.60±0.06            | 1.82±0.03            | 0.64±0.48            |
| 10 min                     | +                 | 3.14±0.23            | n.d.                 | n.d.                 |
| 15 min                     | +                 | 2.68±0.24            | n.d.                 | n.d.                 |
